# Supplementary material
Source: MDPI journal article supplement (https://www.mdpi.com/2673-4826/5/2/14)
Supplement: s1 [file s1]

## Annexure B – Python code for AHP using AHPy

```
import ahpy
import numpy
import scipy
1.# technical=Technical Barriers(TB)
#TB1= Technical Barrier 1 = Lack of Sufficient number of Cross Borders
Interconnections
#TB2= Technical Barrier 2 = Rising domestic generation (including solar
power) in India
#TB3= Technical Barrier 3 = Lack of generation capacity for fulfilling
domestic demand in dry season
#TB4= Technical Barrier 4= Lack of Grid Code Synchronization between
Nepal and its neighbours
2.# financial = Financial Barriers (FB)
#FB1= Financial Barrier 1= Relatively higher cost of hydro energy
#FB2= Financial Barrier 2= Need of Huge investment for construction of
cross border interconnection
#FB3=Declining cost of Renewable energy (Especially Solar Power) in India
3.#policy=Policy Barrier(PB)
#PB1=No Provision of Cross Border ET in Electricity Act 1992
#PB2=Lack of private sector involvement in CBET
#PB3=Lack of Open & non-discriminatory transmission Grid access for CBET;
#PB4=Absence of regional mechanisms (market modality) for cross-border
electricity trade;
#PB5=Lack of Domestic Power sector reforms; (PB5)
#PB6=Ambiguous policies related to CBET issued by India to control trading
in the region and threat of similar policies in future; (PB6)
#PB7=No separate supranational institution/entity responsible for CBET
#PB8=Lack of regulatory harmonization
3.#geopolitical=Socio and Geo-Political Barriers (SGB)
#SGB1= Internal Pressure of prioritization of domestic consumptions over
export;
#SGB2= Lack of continuity in political support for hydro project
development and weak political capacity to facilitate regional electricity
cooperation
#SGB3 = Energy security concerns and trust deficit issues
#SGB4 = Electricity transit facilities via India's grid to export power
from Nepal to Bangladesh
5. #Barriers = Technical , Policy, Financial, Socio and Geopolitical
Barriers
```

5.0

```
technical_comparisons = {('TB1','TB2') : 8,('TB1','TB3'): 1, (
'TB1','TB4'): 1, ('TB2','TB3') : 1/5, ('TB2','TB4') : 1/6, ('TB3','TB4')
:2 }
policy_comparisons = {('PB1','PB2') : 1/7,('PB1','PB3'): 1/7, (
'PB1','PB4'): 1/6, ('PB1','PB5') : 1/6 , ('PB1','PB6') : 1/8,
('PB1','PB7') :1, ('PB1','PB8') : 1/8 , ( 'PB2','PB3') : 1, ('PB2' , 'PB4')
: 1 , ( 'PB2' , 'PB5') : 1/5 , ('PB2' , 'PB6') : 1/6 , ( 'PB2' , 'PB7') :
1/2 ,( 'PB2' , 'PB8') : 1/4 , ( 'PB3','PB4') : 2,
('PB3' , 'PB5') : 2 , ( 'PB3' , 'PB6') : 1/5 , ( 'PB3' , 'PB7') : 1/3
,('PB3','PB8') : 1/3 , ( 'PB4' , 'PB5') : 1 , ( 'PB4' , 'PB6') : 1/5, (
```

```

'PB4', 'PB7') : 1 , ( 'PB4' , 'PB8') : 6 , ( 'PB5' , 'PB6') : 1/4,
('PB5', 'PB7') : 1/2, ('PB5' , 'PB8') : 1 , ( 'PB6', 'PB7') : 8, (
'PB7', 'PB8') : 1/5 }
financial_comparisons = {('FB1', 'FB2') : 2 , ('FB1' , 'FB3') : 1 , ('FB2'
, 'FB3') : 1/5 }
geopolitical_comparisons = {('SGB1', 'SGB2') : 1 , ('SGB1', 'SGB3') : 3, (
'SGB1' , 'SGB4') : 1/7, ( 'SGB2', 'SGB3') : 1,
( 'SGB2' , 'SGB4') : 1/7, ('SGB3', 'SGB4') : 1/5
}
barriers_comparisons = {('technical' , 'financial') : 1, ( 'technical',
'policy') : 1/6 , ( 'technical', 'geopolitical') : 1,
( 'policy', 'geopolitical') : 6, ( 'financial' ,
'policy' ) : 1/5 , ( 'financial', 'geopolitical') : 3 }
technical =
ahpy.Compare('technical', technical_comparisons, precision=3, random_index='saaty')
policy =
ahpy.Compare('policy', policy_comparisons, precision=3, random_index='saaty')
financial =
ahpy.Compare('financial', financial_comparisons, precision=3, random_index='saaty')
geopolitical =
ahpy.Compare('geopolitical', geopolitical_comparisons, precision=3, random_index='saaty')
barriers = ahpy.Compare ('barriers', barriers_comparisons, precision=3,
random_index='saaty')

print(technical.local_weights)

{'TB3': 0.357, 'TB1': 0.33, 'TB4': 0.262, 'TB2': 0.05}

print(technical.consistency_ratio)

0.037

print(financial.local_weights)

{'FB3': 0.498, 'FB1': 0.367, 'FB2': 0.135}

print(financial.consistency_ratio)

0.09

print(policy.local_weights)

{'PB6': 0.341, 'PB4': 0.136, 'PB8': 0.135, 'PB5': 0.091, 'PB3': 0.085,
'PB7': 0.082, 'PB2': 0.055, 'PB2' : 0.053, 'PB1': 0.021}

print(policy.consistency_ratio)

0.184

print(geopolitical.local_weights)

{'SGB4': 0.668, 'SGB1': 0.143, 'SGB2': 0.101, 'SGB3': 0.088}

print(geopolitical.consistency_ratio)

```

0.082

```
print(barriers.global_weights)
```

```
{'policy': 0.639, 'financial': 0.16, 'technical': 0.113, 'geopolitical': 0.087}
```

```
print(barriers.consistency_ratio)
```

0.05

```
import pandas as pd
```

```
df = pd.DataFrame({'TB1': [1, 8, 1, 1],  
                  'TB2': [1/8, 1, 1/5, 1/6],  
                  'TB3': [1, 5, 1, 2],  
                  'TB4': [1, 6, 1, 1/2]})
```

df

|   | TB1 | TB2      | TB3 | TB4 |
|---|-----|----------|-----|-----|
| 0 | 1   | 0.125000 | 1   | 1.0 |
| 1 | 8   | 1.000000 | 5   | 6.0 |
| 2 | 1   | 0.200000 | 1   | 1.0 |
| 3 | 1   | 0.166667 | 2   | 0.5 |

```
import pingouin as pg
```

```
import numpy as np
```

```
pg.cronbach_alpha(data=df)
```

```
(0.8972656142377471, array([0.478, 0.993]))
```

```
import pandas as pd
```

```
df = pd.DataFrame({'PB1': [1, 1/7, 1/7, 1/6, 1/6, 1/8, 1, 1],  
                  'PB2': [7, 1, 1, 1, 1/5, 1/6, 1/2, 1/4],  
                  'PB3': [7, 1, 1, 2, 2, 1/5, 1, 1/3],  
                  'PB4': [6, 1, 1/2, 1, 1, 1/5, 1, 6],  
                  'PB5': [8, 5, 1/2, 1, 1, 1/5, 1, 2],  
                  'PB6': [6, 6, 5, 5, 5, 1, 8, 8],  
                  'PB7': [1, 2, 3, 1, 1, 1/8, 1, 3],  
                  'PB8': [8, 4, 3, 1/6, 1/6, 1/8, 5, 1]})
```

df

|   | PB1      | PB2      | PB3      | PB4 | PB5 | PB6 | PB7   | PB8      |
|---|----------|----------|----------|-----|-----|-----|-------|----------|
| 0 | 1.000000 | 7.000000 | 7.000000 | 6.0 | 8.0 | 6   | 1.000 | 8.000000 |
| 1 | 0.142857 | 1.000000 | 1.000000 | 1.0 | 5.0 | 6   | 2.000 | 4.000000 |
| 2 | 0.142857 | 1.000000 | 1.000000 | 0.5 | 0.5 | 5   | 3.000 | 3.000000 |
| 3 | 0.166667 | 1.000000 | 2.000000 | 1.0 | 1.0 | 5   | 1.000 | 0.166667 |
| 4 | 0.166667 | 0.200000 | 2.000000 | 1.0 | 1.0 | 5   | 1.000 | 0.166667 |
| 5 | 0.125000 | 0.166667 | 0.200000 | 0.2 | 0.2 | 1   | 0.125 | 0.125000 |
| 6 | 1.000000 | 0.500000 | 1.000000 | 1.0 | 1.0 | 8   | 1.000 | 5.000000 |
| 7 | 1.000000 | 0.250000 | 0.333333 | 6.0 | 2.0 | 8   | 3.000 | 1.000000 |

```
import pingouin as pg

pg.cronbach_alpha(data=df)

(0.8569023795830761, array([0.634, 0.967]))
```

```
import pandas as pd
df = pd.DataFrame({'FB1': [1, 2, 1],
                   'FB2': [1, 1, 1/5],
                   'FB3': [1, 5, 1]})
```

```
df
```

|   | FB1 | FB2 | FB3 |
|---|-----|-----|-----|
| 0 | 1   | 1.0 | 1   |
| 1 | 2   | 1.0 | 5   |
| 2 | 1   | 0.2 | 1   |

```
import pingouin as pg

pg.cronbach_alpha(data=df)

(0.8569023795830761, array([0.634, 0.967]))
```

```
import pandas as pd
df = pd.DataFrame({'SGB1': [1, 1, 3, 1/7],
                   'SGB2': [1, 1, 1, 1/7],
                   'SGB3': [1/3, 1, 1, 1/7],
                   'SGB4': [7, 7, 1/5, 1]})
```

```
df
```

|   | SGB1     | SGB2     | SGB3     | SGB4 |
|---|----------|----------|----------|------|
| 0 | 1.000000 | 1.000000 | 0.333333 | 7.0  |
| 1 | 1.000000 | 1.000000 | 1.000000 | 7.0  |
| 2 | 3.000000 | 1.000000 | 1.000000 | 0.2  |
| 3 | 0.142857 | 0.142857 | 0.142857 | 1.0  |

```
import pingouin as pg

pg.cronbach_alpha(data=df)

(0.881737653281901878, array([-3.958, 0.933]))
```
