# Supplementary material
Source: MDPI journal article supplement (https://www.mdpi.com/2673-4826/5/2/14)
Supplement: s1 [file s1]

### Annexure C – Python code for calculating Cronbach's Alpha

```
import pandas as pd
df = pd.DataFrame({'TB1': [1, 8, 1, 1],
                   'TB2': [1/8, 1, 1/5, 1/6],
                   'TB3': [1, 5, 1, 2],
                   'TB4': [1, 6, 1, 1/2]})
```

df

|   | TB1 | TB2      | TB3 | TB4 |
|---|-----|----------|-----|-----|
| 0 | 1   | 0.125000 | 1   | 1.0 |
| 1 | 8   | 1.000000 | 5   | 6.0 |
| 2 | 1   | 0.200000 | 1   | 1.0 |
| 3 | 1   | 0.166667 | 2   | 0.5 |

```
import pingouin as pg
import numpy as np
```

```
pg.cronbach_alpha(data=df)
```

```
(0.8972656142377471, array([0.478, 0.993]))
```

```
import pandas as pd
df = pd.DataFrame({'PB1': [1, 1/7, 1/7, 1/6, 1/6, 1/8, 1, 1],
                   'PB2': [7, 1, 1, 1, 1/5, 1/6, 1/2, 1/4],
                   'PB3': [7, 1, 1, 2, 2, 1/5, 1, 1/3],
                   'PB4': [6, 1, 1/2, 1, 1, 1/5, 1, 6],
                   'PB5': [8, 5, 1/2, 1, 1, 1/5, 1, 2],
                   'PB6': [6, 6, 5, 5, 5, 1, 8, 8],
                   'PB7': [1, 2, 3, 1, 1, 1/8, 1, 3],
                   'PB8': [8, 4, 3, 1/6, 1/6, 1/8, 5, 1]})
```

df

|   | PB1      | PB2      | PB3      | PB4 | PB5 | PB6 | PB7   | PB8      |
|---|----------|----------|----------|-----|-----|-----|-------|----------|
| 0 | 1.000000 | 7.000000 | 7.000000 | 6.0 | 8.0 | 6   | 1.000 | 8.000000 |
| 1 | 0.142857 | 1.000000 | 1.000000 | 1.0 | 5.0 | 6   | 2.000 | 4.000000 |
| 2 | 0.142857 | 1.000000 | 1.000000 | 0.5 | 0.5 | 5   | 3.000 | 3.000000 |
| 3 | 0.166667 | 1.000000 | 2.000000 | 1.0 | 1.0 | 5   | 1.000 | 0.166667 |
| 4 | 0.166667 | 0.200000 | 2.000000 | 1.0 | 1.0 | 5   | 1.000 | 0.166667 |
| 5 | 0.125000 | 0.166667 | 0.200000 | 0.2 | 0.2 | 1   | 0.125 | 0.125000 |
| 6 | 1.000000 | 0.500000 | 1.000000 | 1.0 | 1.0 | 8   | 1.000 | 5.000000 |
| 7 | 1.000000 | 0.250000 | 0.333333 | 6.0 | 2.0 | 8   | 3.000 | 1.000000 |

```
import pingouin as pg
```

```
pg.cronbach_alpha(data=df)
```

```
(0.8569023795830761, array([0.634, 0.967]))
```

```
import pandas as pd
df = pd.DataFrame({'FB1': [1, 2, 1],
                   'FB2': [1, 1, 1/5],
                   'FB3': [1, 5, 1]})

df
```

|   | FB1 | FB2 | FB3 |
|---|-----|-----|-----|
| 0 | 1   | 1.0 | 1   |
| 1 | 2   | 1.0 | 5   |
| 2 | 1   | 0.2 | 1   |

```
import pingouin as pg

pg.cronbach_alpha(data=df)

(0.8569023795830761, array([0.634, 0.967]))
```

```
import pandas as pd
df = pd.DataFrame({'SGB1': [1, 1, 3, 1/7],
                   'SGB2': [1, 1, 1, 1/7],
                   'SGB3': [1/3, 1, 1, 1/7],
                   'SGB4': [7, 7, 1/5, 1]})

df
```

|   | SGB1     | SGB2     | SGB3     | SGB4 |
|---|----------|----------|----------|------|
| 0 | 1.000000 | 1.000000 | 0.333333 | 7.0  |
| 1 | 1.000000 | 1.000000 | 1.000000 | 7.0  |
| 2 | 3.000000 | 1.000000 | 1.000000 | 0.2  |
| 3 | 0.142857 | 0.142857 | 0.142857 | 1.0  |

```
import pingouin as pg

pg.cronbach_alpha(data=df)

(0.881737653281901878, array([-3.958, 0.933]))
```
